# Supplementary material for: Ultra-stretchable supercapacitors based on biaxially pre-strained super-aligned carbon nanotube films
Source: Royal Society of Chemistry journal article supplement (doi:10.1039/d0nr06576e), 2020-01-01
Supplement: d0nr06576e1.pdf [file d0nr06576e1.pdf]

## Ultra-stretchable Supercapacitors Based on Biaxially Pre-stretched Super-aligned Carbon Nanotube Film

Yang Yu,<sup>a,b</sup> Zhenhan Fang,<sup>a,c</sup> Yufeng Luo,<sup>a,b</sup> Hengcai Wu,<sup>a</sup> Qunqing Li,<sup>a,c</sup> Shoushan Fan,<sup>a,c</sup> and  
Jiaping Wang<sup>\*a,c</sup>

a. Department of Physics and Tsinghua-Foxconn Nanotechnology Research Center, Tsinghua University, Beijing, China. E-mail: jpwang@tsinghua.edu.cn

b. School of Materials Science and Engineering, Tsinghua University, Beijing, China.

c. Frontier Science Center for Quantum Information, Beijing, China.

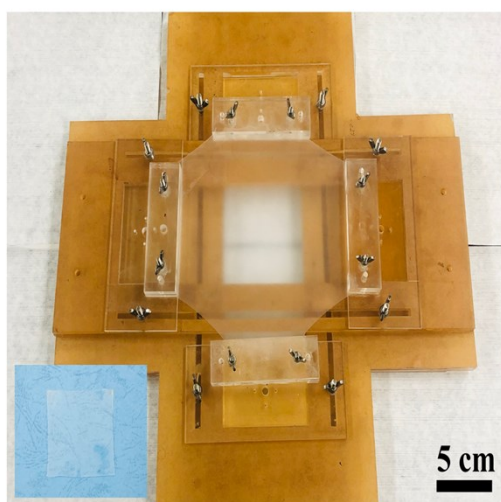

Figure S1. Optical photographs of a PDMS substrate (inset, 60 mm × 60 mm) biaxially stretched to a dimension of 150 mm × 150 mm

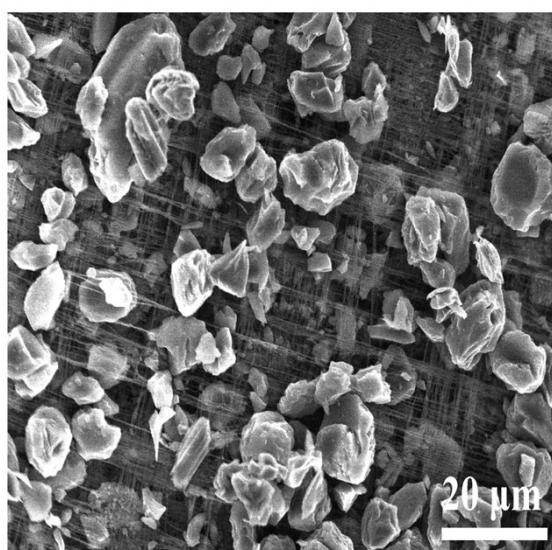

Figure S2. SEM image of AC powders combined on cross-stacked SACNT films
